# Supplementary material for: Late Presentation of Pseudophakic Macula Edema from Oral Kinase Inhibitors: A Case Series and Literature Review
Source: PubMed Central journal article supplement — Case Rep Ophthalmol. 2024 Jan 5;15(1):15–22. doi: 10.1159/000535801 (PMC10769504; doi:10.1159/000535801), 2024-01-05
Supplement: Supplementary_material-Suppl.1-s1.pdf [file Supplementary_material-Suppl.1-s1.pdf]

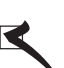

| Topic | Item | Checklist item description | Reported on Line |
|-------|------|----------------------------|------------------|
|-------|------|----------------------------|------------------|

|                        |                   |                                                                                                                  |                                                                                                                  |                                                                                                           |                                                                                                      |            |
|------------------------|-------------------|------------------------------------------------------------------------------------------------------------------|------------------------------------------------------------------------------------------------------------------|-----------------------------------------------------------------------------------------------------------|------------------------------------------------------------------------------------------------------|------------|
| Title                  | 1                 | The diagnosis or intervention of primary focus followed by the words "case report" . . . . .                     | <b>yes</b>                                                                                                       |                                                                                                           |                                                                                                      |            |
|                        | Key Words         | 2                                                                                                                | 2 to 5 key words that identify diagnoses or interventions in this case report, including "case report" . . . . . | <b>yes</b>                                                                                                |                                                                                                      |            |
|                        |                   | Abstract (no references)                                                                                         | 3a                                                                                                               | Introduction: What is unique about this case and what does it add to the scientific literature? . . . . . | <b>yes</b>                                                                                           |            |
|                        |                   |                                                                                                                  | 3b                                                                                                               | Main symptoms and/or important clinical findings . . . . .                                                | <b>yes</b>                                                                                           |            |
|                        |                   |                                                                                                                  | 3c                                                                                                               | The main diagnoses, therapeutic interventions, and outcomes . . . . .                                     | <b>yes</b>                                                                                           |            |
|                        |                   |                                                                                                                  | 3d                                                                                                               | Conclusion—What is the main "take-away" lesson(s) from this case? . . . . .                               | <b>yes</b>                                                                                           |            |
|                        | Introduction      | 4                                                                                                                | One or two paragraphs summarizing why this case is unique ( <b>may include references</b> ) . . . . .            | <b>yes</b>                                                                                                |                                                                                                      |            |
|                        |                   | Patient Information                                                                                              | 5a                                                                                                               | De-identified patient specific information . . . . .                                                      | <b>yes</b>                                                                                           |            |
|                        |                   |                                                                                                                  | 5b                                                                                                               | Primary concerns and symptoms of the patient . . . . .                                                    | <b>yes</b>                                                                                           |            |
|                        |                   |                                                                                                                  | 5c                                                                                                               | Medical, family, and psycho-social history including relevant genetic information . . . . .               | <b>yes</b>                                                                                           |            |
|                        |                   |                                                                                                                  | 5d                                                                                                               | Relevant past interventions with outcomes . . . . .                                                       | <b>yes</b>                                                                                           |            |
|                        | Clinical Findings | 6                                                                                                                | Describe significant physical examination (PE) and important clinical findings. . . . .                          | <b>yes</b>                                                                                                |                                                                                                      |            |
|                        |                   | Timeline                                                                                                         | 7                                                                                                                | Historical and current information from this episode of care organized as a timeline . . . . .            | <b>yes</b>                                                                                           |            |
| Diagnostic Assessment  |                   |                                                                                                                  | 8a                                                                                                               | Diagnostic testing (such as PE, laboratory testing, imaging, surveys) . . . . .                           | <b>yes</b>                                                                                           |            |
|                        |                   |                                                                                                                  | 8b                                                                                                               | Diagnostic challenges (such as access to testing, financial, or cultural) . . . . .                       | <b>n/a</b>                                                                                           |            |
|                        |                   |                                                                                                                  | 8c                                                                                                               | Diagnosis (including other diagnoses considered) . . . . .                                                | <b>yes</b>                                                                                           |            |
|                        |                   |                                                                                                                  | 8d                                                                                                               | Prognosis (such as staging in oncology) where applicable . . . . .                                        | <b>n/a</b>                                                                                           |            |
|                        |                   |                                                                                                                  | Therapeutic Intervention                                                                                         | 9a                                                                                                        | Types of therapeutic intervention (such as pharmacologic, surgical, preventive, self-care) . . . . . | <b>yes</b> |
|                        |                   |                                                                                                                  |                                                                                                                  | 9b                                                                                                        | Administration of therapeutic intervention (such as dosage, strength, duration) . . . . .            | <b>yes</b> |
|                        | 9c                |                                                                                                                  |                                                                                                                  | Changes in therapeutic intervention (with rationale) . . . . .                                            | <b>yes</b>                                                                                           |            |
|                        | 10a               | Clinician and patient-assessed outcomes (if available) . . . . .                                                 |                                                                                                                  | <b>yes</b>                                                                                                |                                                                                                      |            |
| Follow-up and Outcomes | 10b               | Important follow-up diagnostic and other test results . . . . .                                                  | <b>yes</b>                                                                                                       |                                                                                                           |                                                                                                      |            |
|                        | 10c               | Intervention adherence and tolerability (How was this assessed?) . . . . .                                       | <b>yes</b>                                                                                                       |                                                                                                           |                                                                                                      |            |
|                        | 10d               | Adverse and unanticipated events . . . . .                                                                       | <b>n/a</b>                                                                                                       |                                                                                                           |                                                                                                      |            |
|                        | 11a               | A scientific discussion of the strengths AND limitations associated with this case report . . . . .              | <b>yes</b>                                                                                                       |                                                                                                           |                                                                                                      |            |
| Discussion             | 11b               | Discussion of the relevant medical literature <b>with references</b> . . . . .                                   | <b>yes</b>                                                                                                       |                                                                                                           |                                                                                                      |            |
|                        | 11c               | The scientific rationale for any conclusions (including assessment of possible causes) . . . . .                 | <b>yes</b>                                                                                                       |                                                                                                           |                                                                                                      |            |
|                        | 11d               | The primary "take-away" lessons of this case report (without references) in a one paragraph conclusion . . . . . | <b>yes</b>                                                                                                       |                                                                                                           |                                                                                                      |            |
|                        | 12                | The patient should share their perspective in one to two paragraphs on the treatment(s) they received . . . . .  | <b>yes</b>                                                                                                       |                                                                                                           |                                                                                                      |            |
| Patient Perspective    | 13                | Did the patient give informed consent? Please provide if requested . . . . .                                     | <b>yes</b>                                                                                                       |                                                                                                           |                                                                                                      |            |
|                        | Informed Consent  |                                                                                                                  | <b>Yes</b> <input type="checkbox"/> <b>No</b> <input type="checkbox"/>                                           |                                                                                                           |                                                                                                      |            |
